# Supplementary material for: Antimycotic Effects of 11 Essential Oil Components and Their Combinations on 13 Food Spoilage Yeasts and Molds
Source: MDPI journal article supplement (doi:10.3390/jof7100872), 2021-10-16
Supplement: s1 [file s1]

**Journal of Fungi**

Supplementary Material to

# **Antimycotic Effects of 11 Essential Oil Components and Their Combinations on 13 Food Spoilage Yeasts and Molds**

**Laura Nißl, Florian Westhaeuser and Matthias Noll \***

Coburg University of Applied Sciences and Arts, Institute for Bioanalysis, 96450 Coburg, Germany; [lauraNissl@web.de](mailto:lauraNissl@web.de) (L.N.); [florian.westhaeuser@hs-coburg.de](mailto:florian.westhaeuser@hs-coburg.de) (F.W.)

\* Correspondence: [matthias.noll@hs-coburg.de](mailto:matthias.noll@hs-coburg.de); Tel.: +49-9561-317645

**ORCID: Laura Nissl:** 0000-0003-3024-6565; **Matthias Noll:** 0000-0002-9981-5968

**Supplementary Figure S1**

| CA<br>EOCs     |    |            |    | 0.125<br>MIC | 0.25<br>MIC | 0.5<br>MIC | 1<br>MIC | 2 MIC | 0.125<br>MIC | 0.25<br>MIC | 0.5<br>MIC | 1<br>MIC | 2 MIC |
|----------------|----|------------|----|--------------|-------------|------------|----------|-------|--------------|-------------|------------|----------|-------|
|                | 96 | 1          | 2  | 3            | 4           | 5          | 6        | 7     | 8            | 9           | 10         | 11       | 12    |
|                | A  | PC         | NC | MIC CA alone |             |            |          |       |              |             |            |          |       |
| 0.03125<br>MIC | B  | MIC of EOC |    |              |             |            |          |       |              |             |            |          |       |
| 0.0625<br>MIC  | C  |            |    |              |             |            |          |       |              |             |            |          |       |
| 0.125<br>MIC   | D  |            |    |              |             |            |          |       |              |             |            |          |       |
| 0.25<br>MIC    | E  |            |    |              |             |            |          |       |              |             |            |          |       |
| 0.5<br>MIC     | F  |            |    |              |             |            |          |       |              |             |            |          |       |
| 1<br>MIC       | G  |            |    |              |             |            |          |       |              |             |            |          |       |
| 2<br>MIC       | H  |            |    |              |             |            |          |       |              |             |            |          |       |

**Figure S1.** Microtiter plate set-up for simultaneous MIC and FIC determination (modified from [1]). Grey shading indicate non-inoculated controls. (PC = positive control; NC = negative control)

1. Fratini F, Mancini S, Turchi B, Friscia E, Pistelli L, Giusti G, Cerri D (2017) A novel interpretation of the Fractional Inhibitory Concentration Index: The case *Origanum vulgare* L. and *Leptospermum scoparium* J. R. et G. Forst essential oils against *Staphylococcus aureus* strains. *Microbiol Res.* 195:11–17.
